# Supplementary material for: Cage-like Ta@Bqn complexes (n = 23–28, q = −1–+ 3) in 18-electron configurations with the highest coordination number of twenty-eight
Source: Royal Society of Chemistry journal article supplement (doi:10.1039/c8nr01087k), 2018-01-01
Supplement: c8nr01087k1.pdf [file c8nr01087k1.pdf]

## Supporting Information

### **Cage-like Ta@B<sub>n</sub><sup>q</sup> complexes (n=23~28, q=-1~+3) in 18-electron configurations with the highest coordination number of twenty-eight**

Hai-Ru Li, Hui Liu, Xiao-Qin Lu, Wen-Yan Zan, Xin-Xin Tian, Hai-Gang Lu,  
Yan-Bo Wu, Yue-Wen Mu\* and Si-Dian Li\*

Institute of Molecular Science, Shanxi University, Taiyuan 030006, China.

\*E-mail: ywmu@sxu.edu.cn; lisidian@sxu.edu.cn

**Figure S1.** Configurational energy spectra of (a)  $\text{TaB}_{24}^+$ , (b)  $\text{TaB}_{25}$ , (c)  $\text{TaB}_{26}^+$ , and (d)  $\text{TaB}_{27}^{2+}$  at CCSD(T) level with the relative energies indicated in eV.

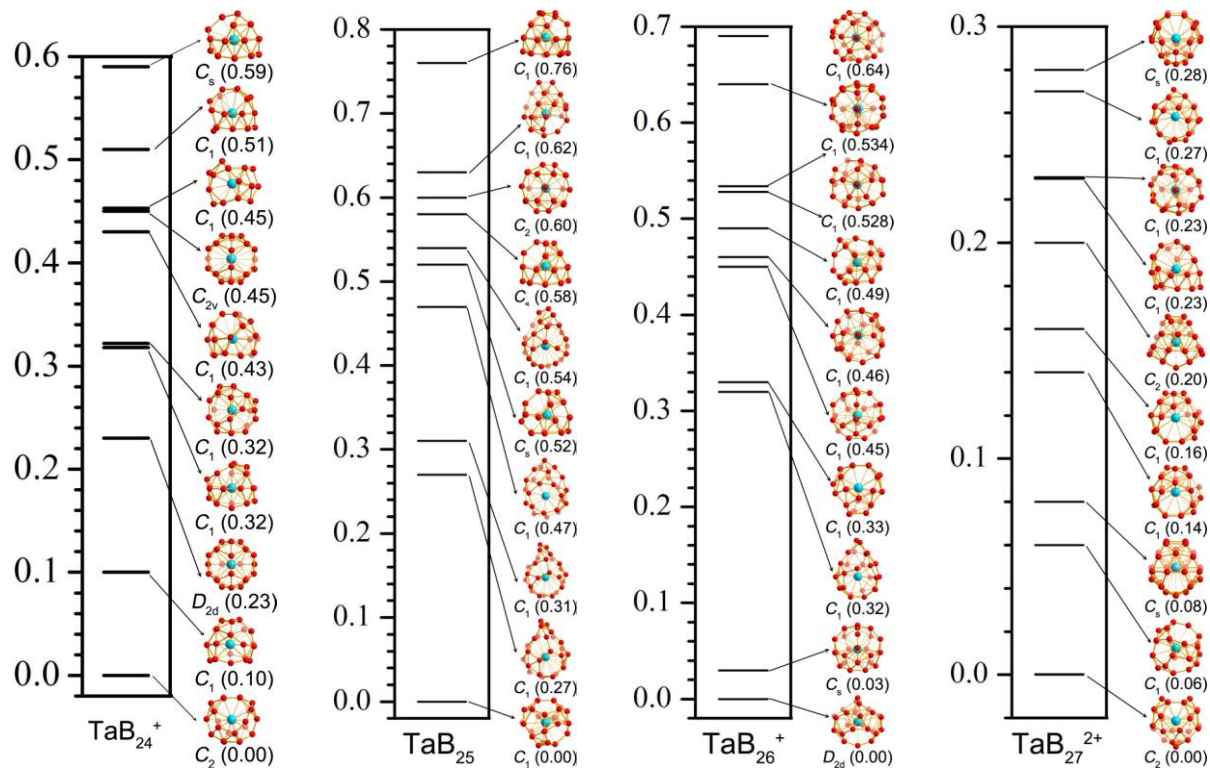

**Figure S2.** The three lowest-lying isomers of  $WB_{24}$  at CCSD(T) level with their relative energies indicated in eV.

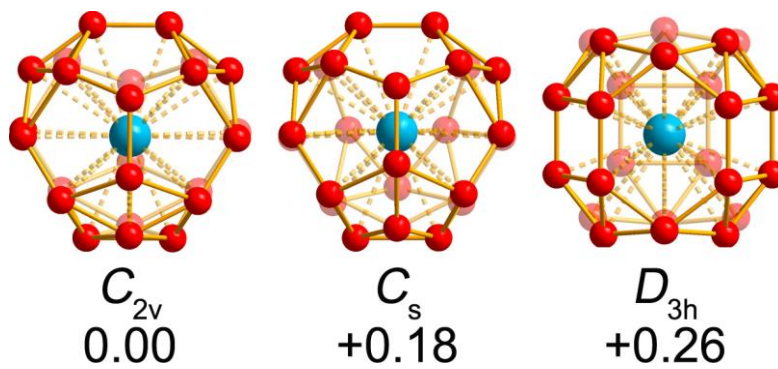

**Figure S3.** Molecular dynamics simulations of  $C_{2v}$  Ta@B<sub>24</sub><sup>-</sup> (**4**) at 400K and 450K for 30 ps, with the root-mean-square-deviation (RMSD) and maximum bond length deviation (MAXD) values (on average) indicated in Å.

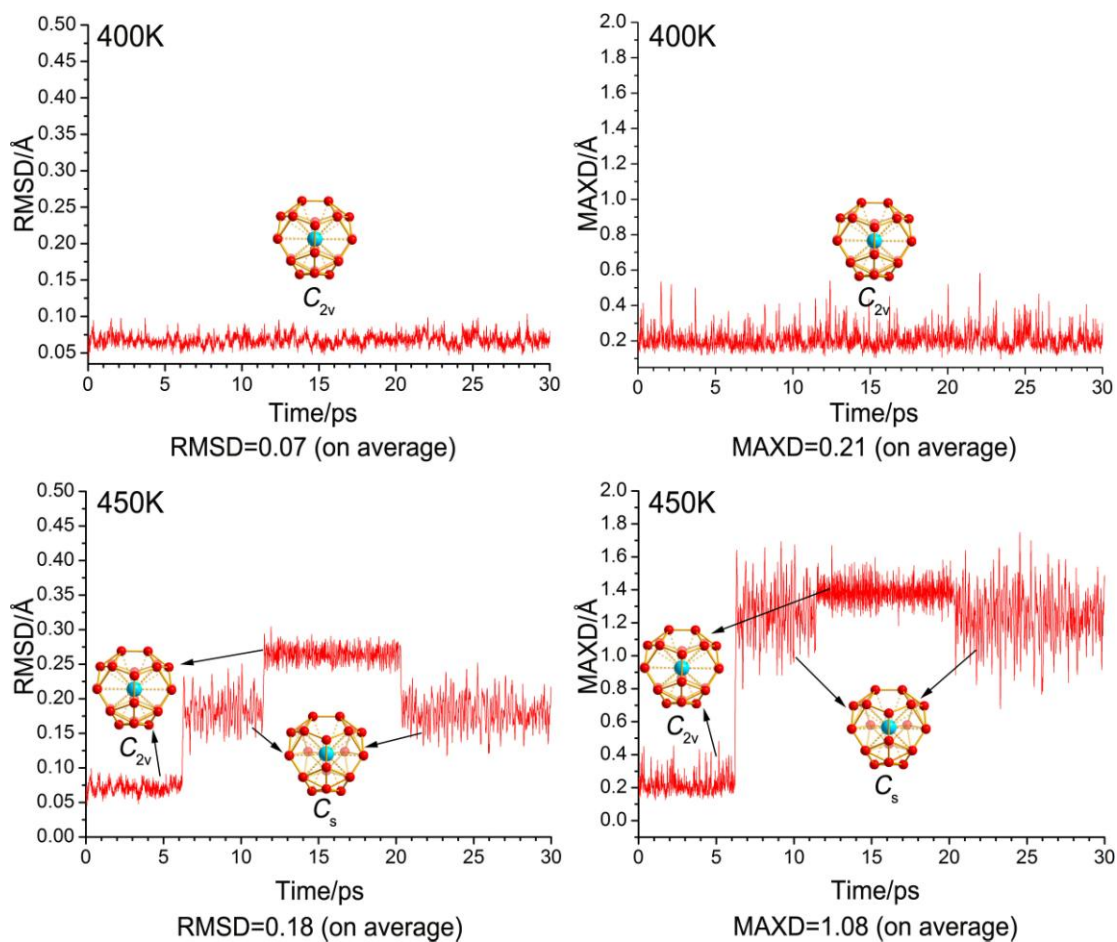

**Figure S4.** Low-lying isomers of  $\text{TaB}_{29}^{4+}$  at CCSD(T) level with their relative energies indicated in eV.

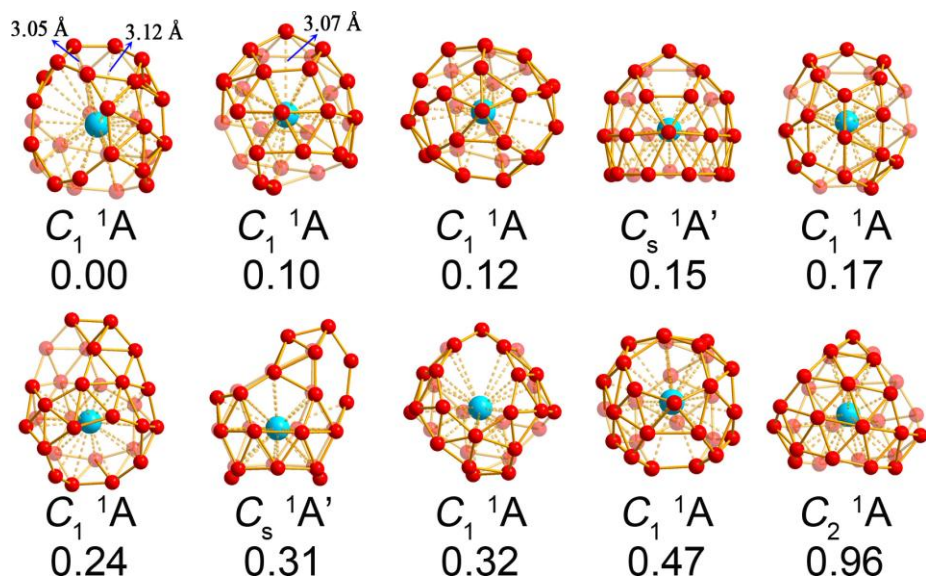

**Figure S5.** Variation of the coordination numbers of transition-metal-centered boron complexes  $M@B_n$  in different charge states in the size range between  $n=8-29$ .

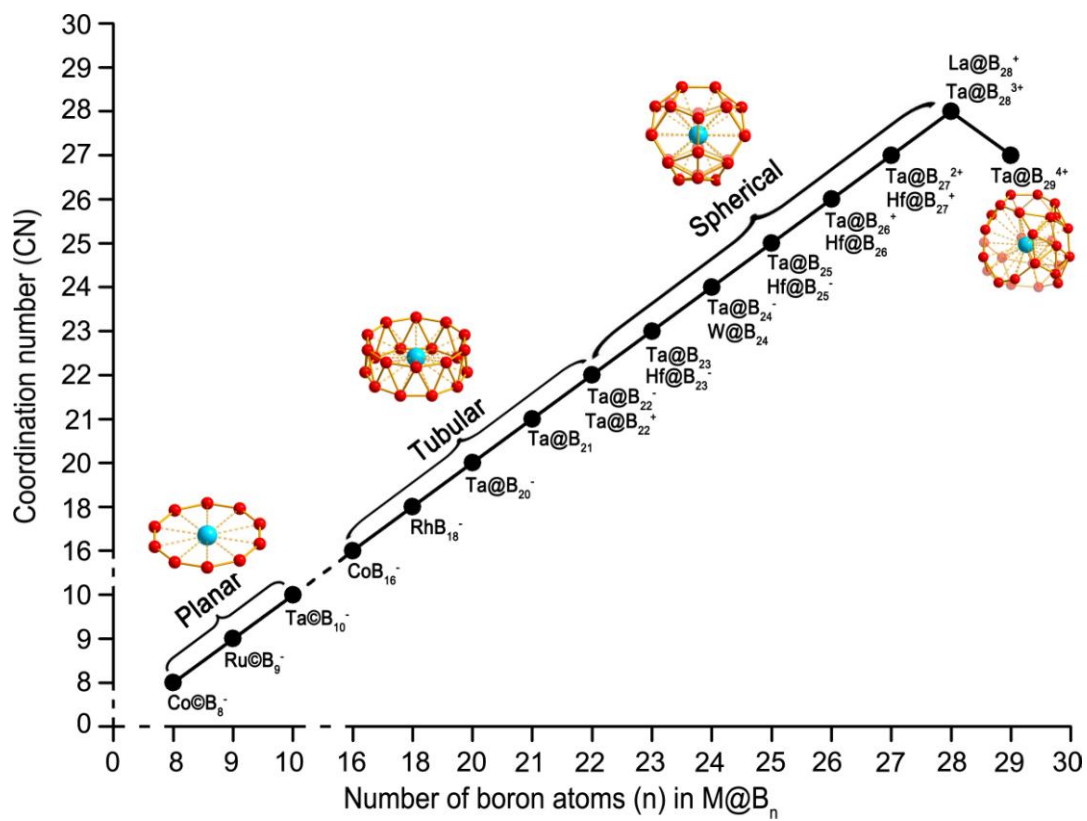

**Figure S6.** Eigenvalue spectra of Ta@B<sub>23</sub>(**2**), Ta@B<sub>24</sub><sup>+</sup>(**3**), Ta@B<sub>25</sub>(**5**), Ta@B<sub>26</sub><sup>+</sup>(**6**), Ta@B<sub>27</sub><sup>2+</sup>(**7**), and Ta@B<sub>28</sub><sup>3+</sup>(**8**).

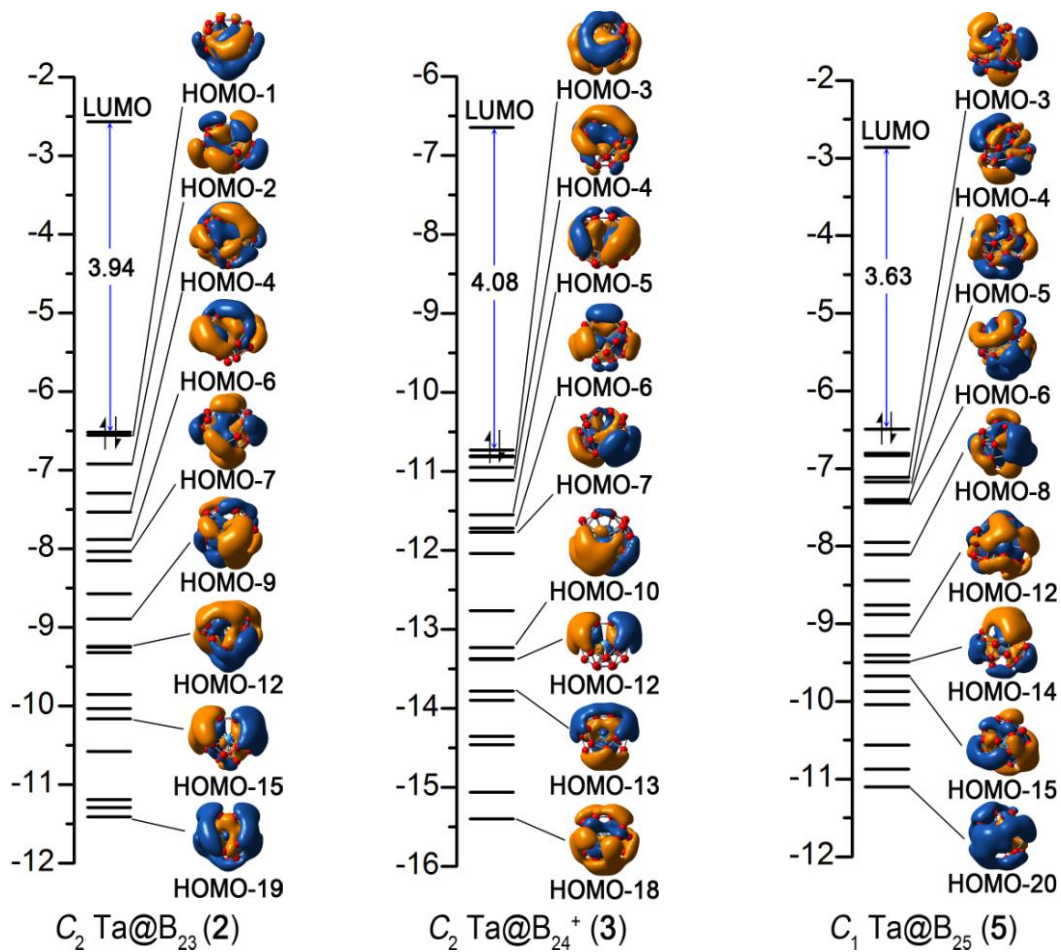



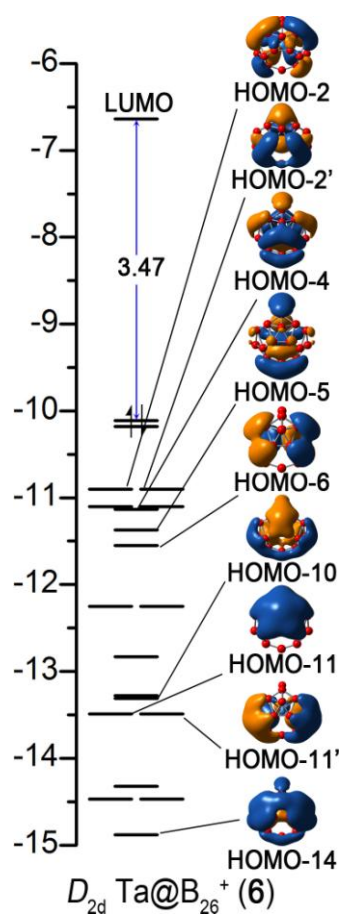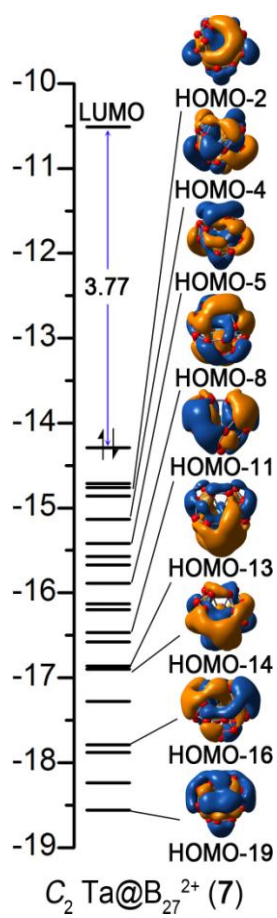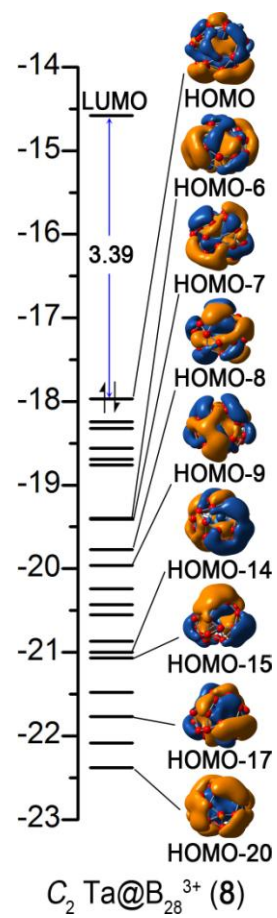



**Figure S7.** AdNDP bonding patterns of (a) Ta@B<sub>23</sub>(**2**), (b) Ta@B<sub>24</sub><sup>+</sup>(**3**), (c) Ta@B<sub>24</sub><sup>-</sup>(**4**), (d) Ta@B<sub>25</sub>(**5**), (e) Ta@B<sub>26</sub><sup>+</sup>(**6**), (f) Ta@B<sub>25</sub>(**7**), and (g)Ta@B<sub>28</sub><sup>3+</sup>(**8**).

(a) C<sub>2</sub> Ta@B<sub>23</sub>(**2**)

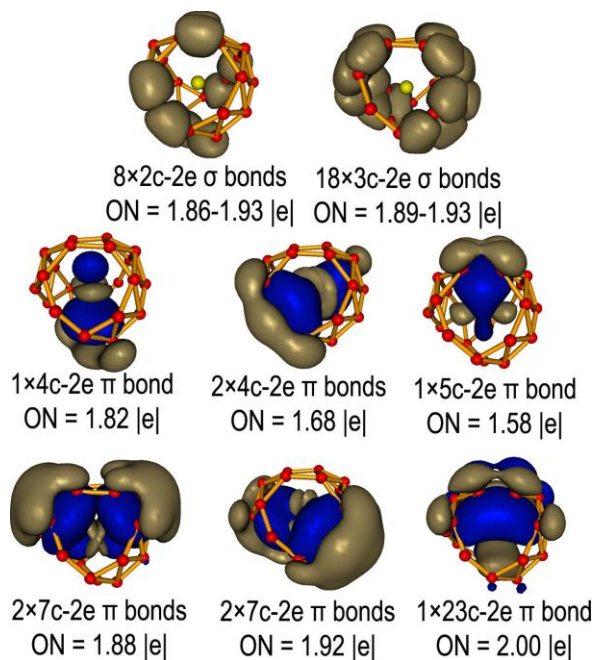

(b) C<sub>2</sub> Ta@B<sub>24</sub><sup>+</sup>(**3**)

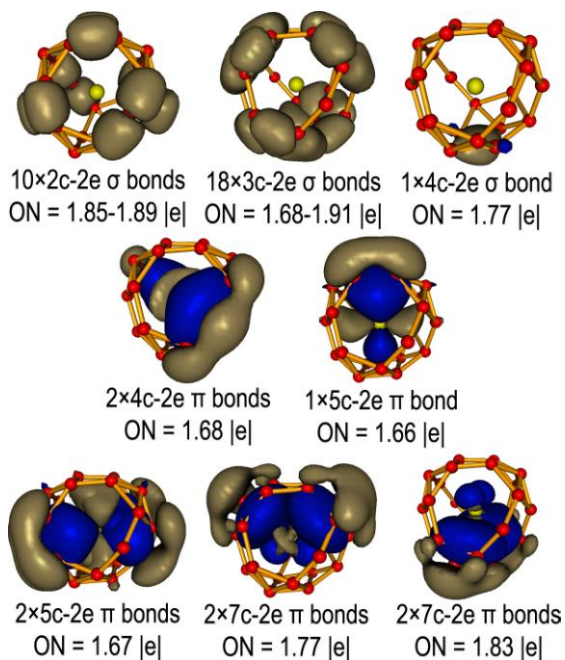

(c) C<sub>2v</sub> Ta@B<sub>24</sub><sup>-</sup>(**4**)

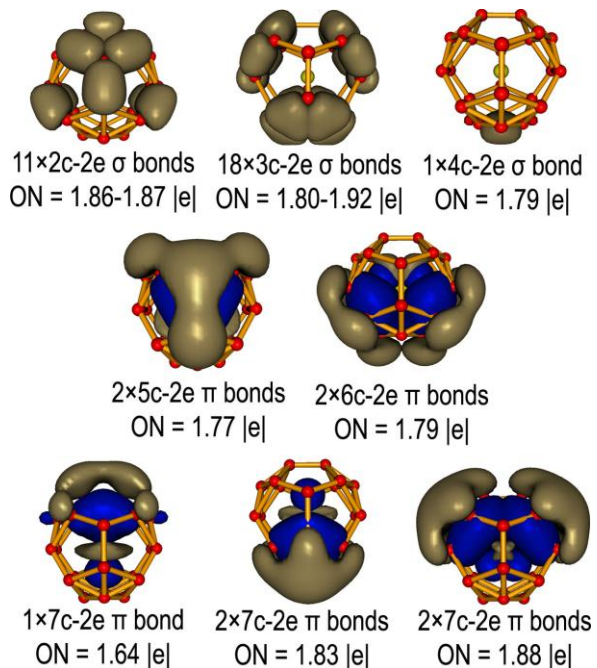

(d) C<sub>1</sub> Ta@B<sub>25</sub>(**5**)

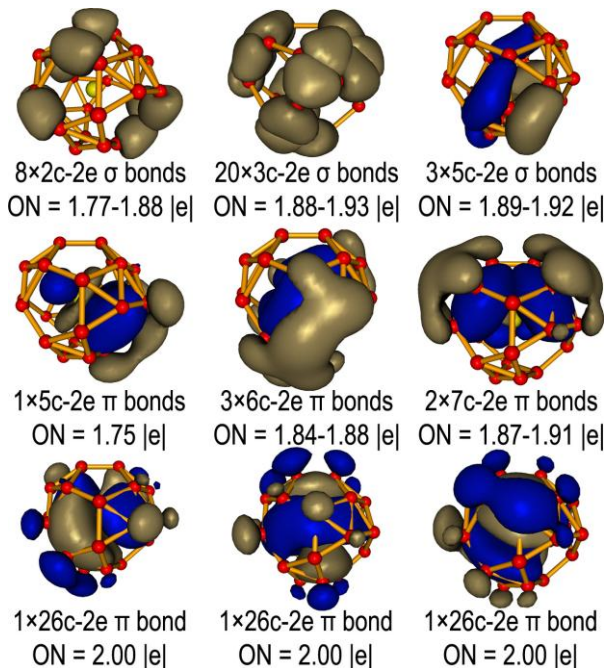

(e)  $D_{2d}$  Ta@B<sub>26</sub><sup>+</sup> (6)

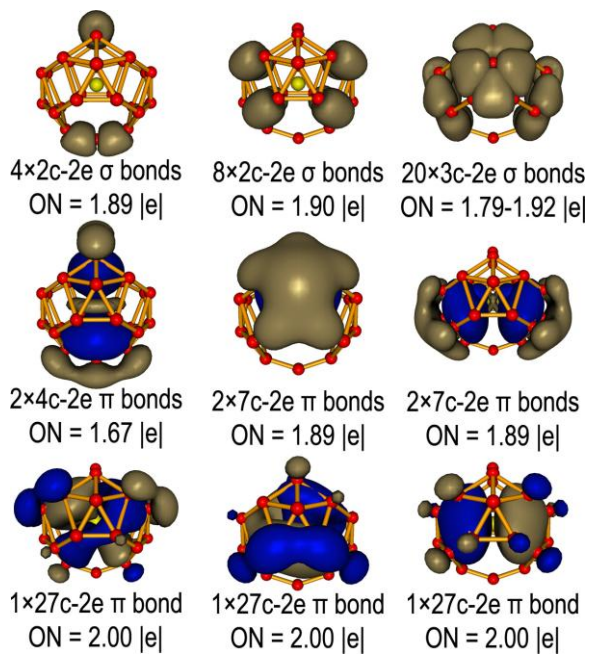

(f)  $C_2$  Ta@B<sub>27</sub><sup>2+</sup> (7)

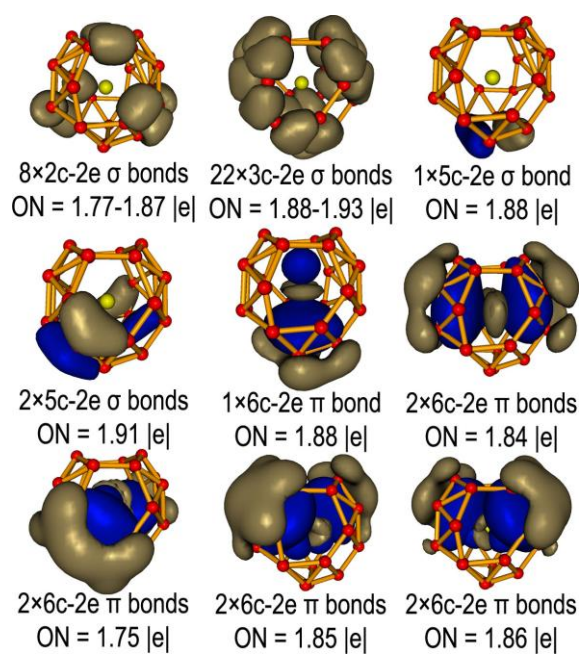

(g)  $C_2$  Ta@B<sub>28</sub><sup>3+</sup> (8)

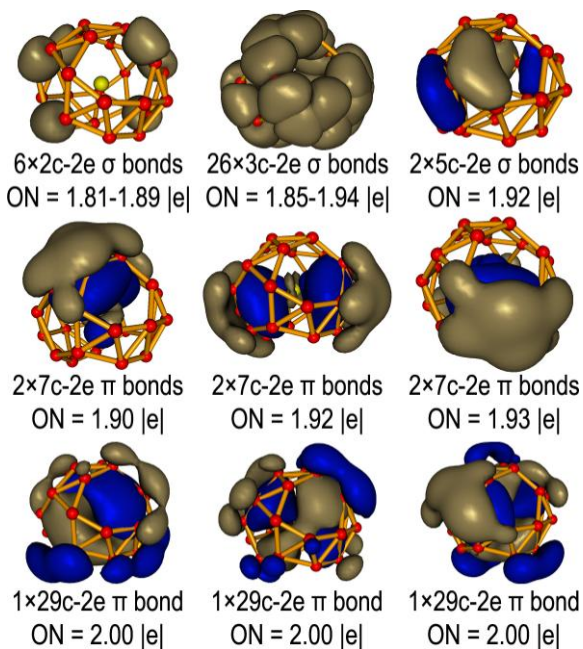

**Figure S8.** Simulated (a) IR, (b) Raman, and (c) UV-vis spectra of Ta@B<sub>23</sub>(2), Ta@B<sub>24</sub><sup>+</sup>(3), Ta@B<sub>25</sub>(5), Ta@B<sub>26</sub><sup>+</sup>(6), Ta@B<sub>27</sub><sup>2+</sup>(7), and Ta@B<sub>28</sub><sup>3+</sup>(8) at PBE0 level.

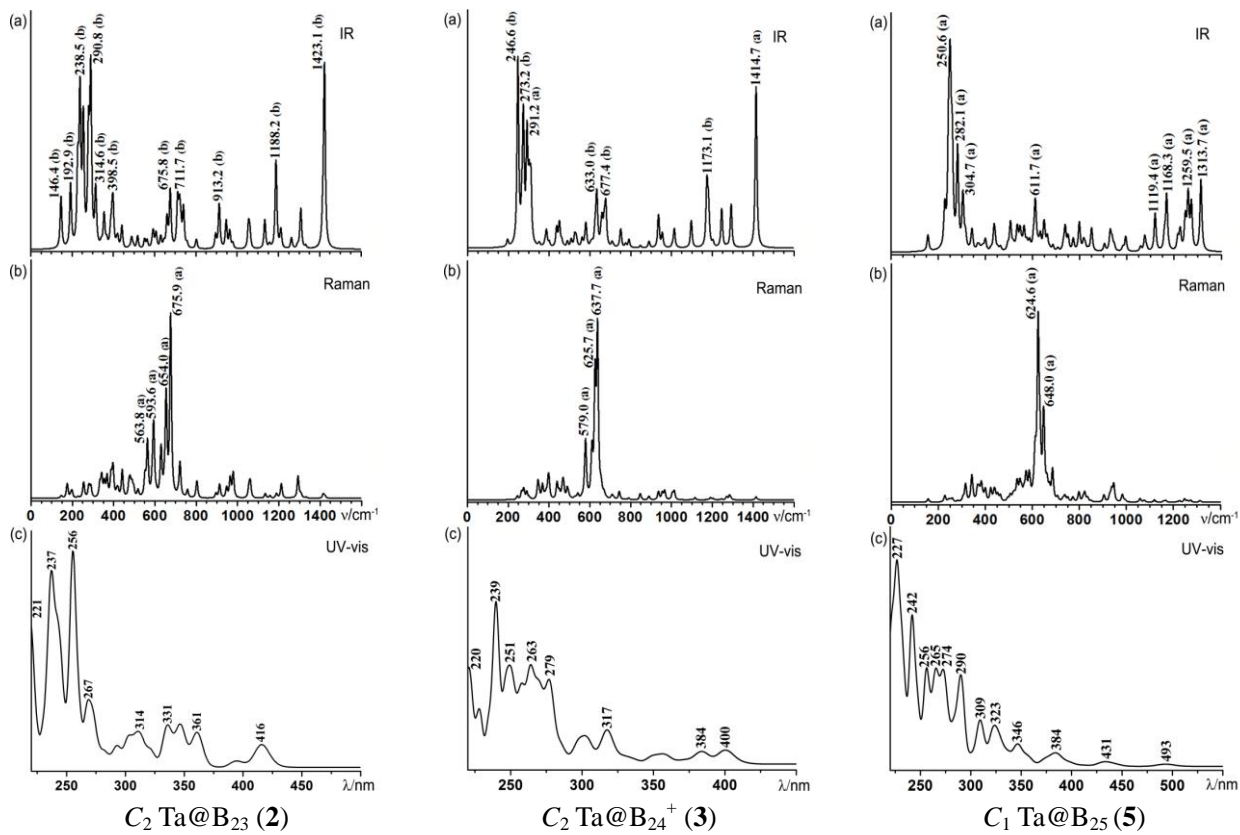

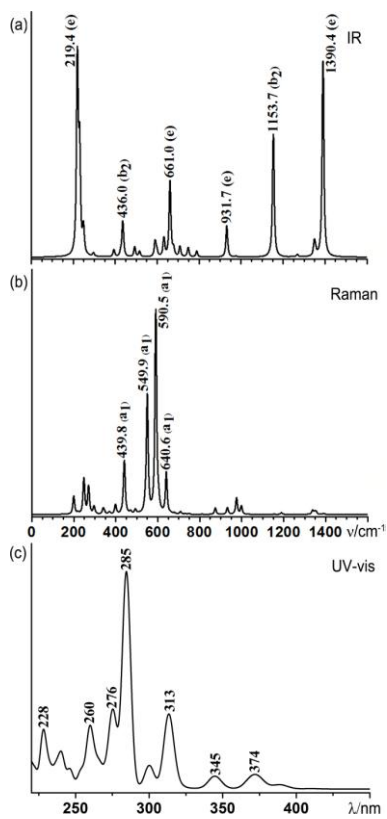

$D_{2d} \text{Ta@B}_{26}^{+}$  (6)

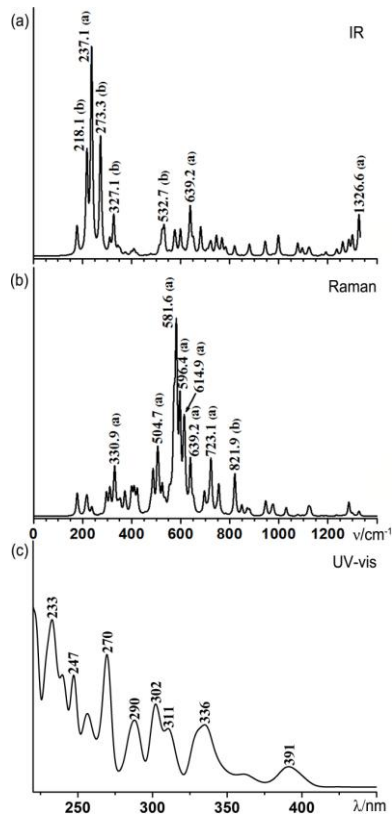

$C_2 \text{Ta@B}_{27}^{2+}$  (7)

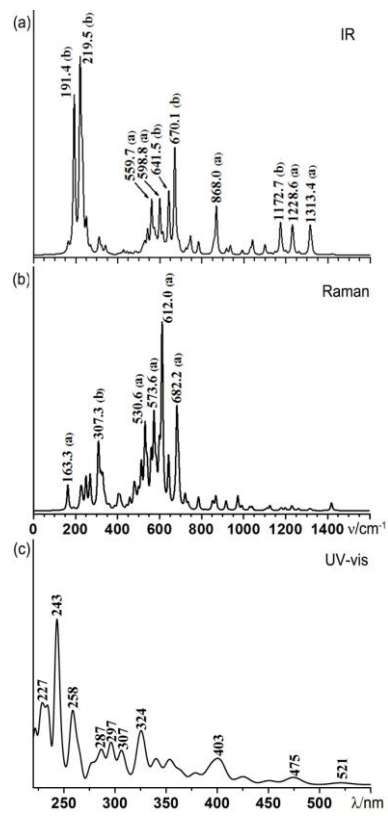

$C_2 \text{Ta@B}_{28}^{3+}$  (8)

**Table S1.** HOMO-LUMO energy gaps ( $\Delta E_{\text{Gap}}$ ), minimum ( $r_{\text{min}}$ ), maximum ( $r_{\text{max}}$ ), and average ( $r_{\text{av}}$ ) Ta-B distances, average Ta-B Wiberg bond orders ( $\text{BO}_{\text{av}}$ ), total Wiberg bond orders ( $\text{BO}_{\text{Ta}}$ ), natural atomic charges ( $q_{\text{Ta}}$ ), and electronic configurations of the Ta centers in the endohedral metalloborospherene family **1-8** ( $n=22-28$ ).

| Ta@B <sub>n</sub>                             | $\Delta E_{\text{Gap}}/\text{eV}$ | $r_{\text{min}}/\text{\AA}$ | $r_{\text{max}}/\text{\AA}$ | $r_{\text{av}}/\text{\AA}$ | $\text{WBI}_{\text{av}}$ | $\text{WBI}_{\text{Ta}}$ | $q_{\text{Ta}}/ e $ | electronic configuration                   |
|-----------------------------------------------|-----------------------------------|-----------------------------|-----------------------------|----------------------------|--------------------------|--------------------------|---------------------|--------------------------------------------|
| Ta@B <sub>22</sub> <sup>-</sup> ( <b>1</b> )  | 3.60                              | 2.40                        | 2.52                        | 2.48                       | 0.27                     | 5.91                     | -0.05               | Ta[5d <sup>4.54</sup> 6s <sup>0.27</sup> ] |
| Ta@B <sub>23</sub> ( <b>2</b> )               | 3.94                              | 2.40                        | 2.64                        | 2.53                       | 0.26                     | 5.91                     | -0.14               | Ta[5d <sup>4.64</sup> 6s <sup>0.27</sup> ] |
| Ta@B <sub>24</sub> <sup>+</sup> ( <b>3</b> )  | 4.08                              | 2.38                        | 2.62                        | 2.51                       | 0.26                     | 6.12                     | -0.37               | Ta[5d <sup>4.74</sup> 6s <sup>0.35</sup> ] |
| Ta@B <sub>24</sub> <sup>-</sup> ( <b>4</b> )  | 3.86                              | 2.39                        | 2.53                        | 2.47                       | 0.26                     | 6.33                     | -0.64               | Ta[5d <sup>4.91</sup> 6s <sup>0.43</sup> ] |
| Ta@B <sub>25</sub> ( <b>5</b> )               | 3.63                              | 2.42                        | 2.66                        | 2.53                       | 0.25                     | 6.20                     | -0.49               | Ta[5d <sup>4.82</sup> 6s <sup>0.42</sup> ] |
| Ta@B <sub>26</sub> <sup>+</sup> ( <b>6</b> )  | 3.47                              | 2.60                        | 2.74                        | 2.64                       | 0.23                     | 5.97                     | -0.31               | Ta[5d <sup>4.76</sup> 6s <sup>0.34</sup> ] |
| Ta@B <sub>27</sub> <sup>2+</sup> ( <b>7</b> ) | 3.78                              | 2.48                        | 2.80                        | 2.61                       | 0.23                     | 6.22                     | -0.49               | Ta[5d <sup>4.78</sup> 6s <sup>0.45</sup> ] |
| Ta@B <sub>28</sub> <sup>3+</sup> ( <b>8</b> ) | 3.39                              | 2.50                        | 2.92                        | 2.68                       | 0.22                     | 6.09                     | -0.44               | Ta[5d <sup>4.79</sup> 6s <sup>0.43</sup> ] |



**Table S2.** Optimized geometries and coordinates at PBE0 level. $D_2$  Ta@B<sub>22</sub><sup>-</sup> (1)

|    |             |             |             |
|----|-------------|-------------|-------------|
| B  | 1.90907700  | 1.24183800  | -0.74354600 |
| B  | 0.45462300  | 2.36796300  | -0.64570500 |
| B  | 0.00000000  | 0.00000000  | -2.48080400 |
| B  | 0.72663000  | 1.46560100  | -1.91135700 |
| B  | -2.32627500 | 0.54007700  | -0.66610300 |
| B  | -1.54638700 | 0.00033900  | -1.95141200 |
| B  | -0.45462300 | 2.36796300  | 0.64570500  |
| B  | -0.72663000 | 1.46560100  | 1.91135700  |
| B  | -1.90907700 | 1.24183800  | 0.74354600  |
| B  | -0.72663000 | -1.46560100 | -1.91135700 |
| B  | -1.90907700 | -1.24183800 | -0.74354600 |
| B  | 2.32627500  | -0.54007700 | -0.66610300 |
| B  | 1.54638700  | -0.00033900 | -1.95141200 |
| B  | 1.54638700  | 0.00033900  | 1.95141200  |
| B  | 2.32627500  | 0.54007700  | 0.66610300  |
| B  | -2.32627500 | -0.54007700 | 0.66610300  |
| B  | -1.54638700 | -0.00033900 | 1.95141200  |
| B  | 0.00000000  | 0.00000000  | 2.48080400  |
| Ta | 0.00000000  | 0.00000000  | 0.00000000  |
| B  | -0.45462300 | -2.36796300 | -0.64570500 |
| B  | 1.90907700  | -1.24183800 | 0.74354600  |
| B  | 0.72663000  | -1.46560100 | 1.91135700  |
| B  | 0.45462300  | -2.36796300 | 0.64570500  |

C<sub>2</sub>Ta@B<sub>23</sub> (2)

|    |             |             |             |
|----|-------------|-------------|-------------|
| B  | -0.62210100 | 2.20434000  | -0.66033300 |
| B  | -2.16555100 | 0.58572100  | 1.43898400  |
| B  | -1.17921400 | -0.36996400 | -2.08162500 |
| B  | -0.76469300 | -1.85332600 | -1.59903000 |
| B  | 0.00000000  | 0.00000000  | 2.53504800  |
| B  | 2.12562000  | 1.21170000  | -0.91500500 |
| B  | -1.58988500 | 1.84498700  | 0.66590200  |
| B  | -2.54476600 | -0.49336600 | 0.40195500  |
| B  | 0.00000000  | -2.32869900 | 1.03567100  |
| B  | 1.13798200  | 2.25840200  | -0.02436500 |
| B  | 1.58988500  | -1.84498700 | 0.66590200  |
| B  | 0.65876900  | -1.15741700 | -1.99053000 |
| B  | 0.00000000  | 2.32869900  | 1.03567100  |
| B  | 0.77381300  | -1.29268700 | 2.09717300  |
| B  | -2.12562000 | -1.21170000 | -0.91500500 |
| B  | -0.65876900 | 1.15741700  | -1.99053000 |
| B  | 2.16555100  | -0.58572100 | 1.43898400  |
| B  | 1.17921400  | 0.36996400  | -2.08162500 |
| B  | 0.76469300  | 1.85332600  | -1.59903000 |
| B  | 0.62210100  | -2.20434000 | -0.66033300 |
| B  | -0.77381300 | 1.29268700  | 2.09717300  |
| B  | 2.54476600  | 0.49336600  | 0.40195500  |
| Ta | 0.00000000  | 0.00000000  | 0.04981900  |
| B  | -1.13798200 | -2.25840200 | -0.02436500 |



$C_2 Ta@B_{24}^+ (3)$ 

|    |             |             |             |
|----|-------------|-------------|-------------|
| B  | -0.66343500 | 0.65586600  | -2.18112800 |
| B  | 0.00000000  | 2.11198900  | -1.33322800 |
| B  | 2.03582000  | 0.01171500  | -1.43605600 |
| B  | 0.97733900  | 1.04250100  | -2.09315200 |
| B  | 2.43988300  | -0.42365900 | 0.07068400  |
| B  | 2.02043200  | -0.17806600 | 1.62873100  |
| B  | -1.02150500 | 2.40315100  | -0.17506000 |
| B  | -1.70408900 | 1.69297900  | 1.01455500  |
| B  | 0.93074800  | 0.96814700  | 2.13077700  |
| B  | -0.93074800 | -0.96814700 | 2.13077700  |
| B  | 1.70408900  | -1.69297900 | 1.01455500  |
| B  | -0.97733900 | -1.04250100 | -2.09315200 |
| B  | 0.66343500  | -0.65586600 | -2.18112800 |
| B  | -2.43988300 | 0.42365900  | 0.07068400  |
| B  | -2.03582000 | -0.01171500 | -1.43605600 |
| B  | 0.69418900  | -0.97144200 | 2.20399800  |
| B  | -0.69418900 | 0.97144200  | 2.20399800  |
| B  | -2.02043200 | 0.17806600  | 1.62873100  |
| Ta | 0.00000000  | 0.00000000  | 0.01017300  |
| B  | 1.02150500  | -2.40315100 | -0.17506000 |
| B  | -1.58245200 | -1.71105300 | -0.73465400 |
| B  | -1.91116100 | -1.30679800 | 0.83026900  |
| B  | 0.00000000  | -2.11198900 | -1.33322800 |
| B  | 1.58245200  | 1.71105300  | -0.73465400 |
| B  | 1.91116100  | 1.30679800  | 0.83026900  |

$C_{2v}$  Ta@B<sub>24</sub><sup>-</sup> (4)

|    |             |             |             |
|----|-------------|-------------|-------------|
| B  | 1.46728200  | 1.43555000  | 1.30372000  |
| B  | 0.00000000  | 1.40090400  | 2.05005100  |
| B  | -1.37259000 | -1.47439200 | -1.45841100 |
| B  | 1.46728200  | -1.43555000 | 1.30372000  |
| B  | 0.00000000  | -2.35618000 | 0.74159600  |
| B  | 0.00000000  | -1.40090400 | 2.05005100  |
| B  | -2.12037600 | 0.00000000  | -1.38135900 |
| B  | -0.82093500 | 0.00000000  | -2.35453500 |
| B  | 0.00000000  | 2.31283200  | -0.94721000 |
| B  | 0.82093500  | 0.00000000  | -2.35453500 |
| B  | 1.37259000  | 1.47439200  | -1.45841100 |
| B  | 2.12037600  | 0.00000000  | -1.38135900 |
| B  | 0.00000000  | -2.31283200 | -0.94721000 |
| B  | -1.46728200 | 1.43555000  | 1.30372000  |
| B  | -1.37259000 | 1.47439200  | -1.45841100 |
| B  | 0.00000000  | 2.35618000  | 0.74159600  |
| B  | 1.37259000  | -1.47439200 | -1.45841100 |
| B  | 2.29445300  | -0.89959300 | -0.01435700 |
| B  | 0.92295300  | 0.00000000  | 2.21097600  |
| B  | -2.29445300 | -0.89959300 | -0.01435700 |
| B  | -0.92295300 | 0.00000000  | 2.21097600  |
| B  | 2.29445300  | 0.89959300  | -0.01435700 |
| B  | -1.46728200 | -1.43555000 | 1.30372000  |
| B  | -2.29445300 | 0.89959300  | -0.01435700 |
| Ta | 0.00000000  | 0.00000000  | 0.00254500  |

$C_I$  Ta@B<sub>25</sub> (5)

|    |             |             |             |
|----|-------------|-------------|-------------|
| B  | -2.22849200 | 1.41535400  | 0.09143000  |
| B  | -1.79709500 | 0.65249500  | -1.48606300 |
| B  | 1.61226300  | 2.08124700  | 0.07873400  |
| B  | 0.04609500  | 2.48574000  | 0.46471100  |
| B  | 2.11479100  | -0.40346800 | -1.37167500 |
| B  | 2.47684500  | 0.67105300  | -0.21687800 |
| B  | -2.60249300 | -0.11733300 | -0.19688300 |
| B  | -0.40123900 | -1.71480100 | -1.73468700 |
| B  | 0.65621600  | -0.33907900 | -2.30511600 |
| B  | 1.96466400  | 1.03475400  | 1.31330300  |
| B  | 1.88859100  | -1.70618500 | -0.03794600 |
| B  | -1.15961500 | 1.77616500  | 1.36004600  |
| B  | 1.03869300  | 0.10712200  | 2.30040300  |
| B  | -2.10628000 | -1.53183200 | 0.43717100  |
| B  | -1.53413300 | -0.92037600 | 1.79758600  |
| B  | 1.18481900  | -1.72634200 | -1.52235900 |
| B  | 0.38089200  | -2.44251200 | -0.24282100 |
| B  | -1.83714800 | -1.15080500 | -1.24714000 |
| Ta | 0.01268800  | -0.00695200 | 0.00390600  |
| B  | 2.15319300  | -0.58260000 | 1.10435300  |
| B  | -0.65673000 | 0.46641400  | 2.31728000  |
| B  | -0.65915600 | -2.18415500 | 1.02425700  |
| B  | 0.02348900  | -1.12271000 | 2.24101200  |
| B  | -1.04935300 | 2.05801300  | -0.92868600 |
| B  | -0.23158100 | 1.07308100  | -2.14953100 |
| B  | 0.53751800  | 2.22226000  | -1.14752800 |

$D_{2d}$  Ta@B<sub>26</sub><sup>+</sup> (6)

|    |             |             |             |
|----|-------------|-------------|-------------|
| B  | -0.81654500 | 2.47245300  | 0.56192900  |
| B  | 0.00000000  | 2.58995600  | -0.88822200 |
| B  | 0.00000000  | -2.58995600 | -0.88822200 |
| B  | 2.47245300  | 0.81654500  | -0.56192900 |
| B  | 2.47245300  | -0.81654500 | -0.56192900 |
| B  | 1.40428800  | 1.84409800  | -1.18832800 |
| B  | -2.47245300 | -0.81654500 | -0.56192900 |
| B  | -0.81654500 | -2.47245300 | 0.56192900  |
| B  | -1.48638800 | 0.00000000  | 2.13558400  |
| B  | 0.00000000  | 0.00000000  | 2.62108500  |
| B  | -1.84409800 | -1.40428800 | 1.18832800  |
| B  | 1.84409800  | -1.40428800 | 1.18832800  |
| B  | 1.40428800  | -1.84409800 | -1.18832800 |
| B  | -2.58995600 | 0.00000000  | 0.88822200  |
| B  | -2.47245300 | 0.81654500  | -0.56192900 |
| B  | -1.84409800 | 1.40428800  | 1.18832800  |
| B  | 0.81654500  | -2.47245300 | 0.56192900  |
| B  | 1.84409800  | 1.40428800  | 1.18832800  |
| B  | 0.81654500  | 2.47245300  | 0.56192900  |
| B  | 0.00000000  | 0.00000000  | -2.62108500 |
| B  | -1.40428800 | 1.84409800  | -1.18832800 |
| B  | 1.48638800  | 0.00000000  | 2.13558400  |
| B  | 0.00000000  | -1.48638800 | -2.13558400 |
| B  | -1.40428800 | -1.84409800 | -1.18832800 |
| Ta | 0.00000000  | 0.00000000  | 0.00000000  |
| B  | 0.00000000  | 1.48638800  | -2.13558400 |
| B  | 2.58995600  | 0.00000000  | 0.88822200  |

$C_2 Ta@B_{27}^{2+}$  (7)

|    |             |             |             |
|----|-------------|-------------|-------------|
| B  | 2.51508900  | 0.89667300  | 0.48328300  |
| B  | 0.17704000  | 1.72140000  | 1.84915200  |
| B  | 2.34707600  | 1.06456400  | -1.09424500 |
| B  | 1.57364200  | 0.79275300  | 1.91400400  |
| B  | -1.52540000 | 1.79135500  | -0.79412400 |
| B  | -1.16069400 | 0.83482100  | 2.25242900  |
| B  | 0.38698300  | -1.54447100 | -1.97028400 |
| B  | 1.27785600  | -1.93622500 | 0.98808000  |
| B  | -0.17704000 | -1.72140000 | 1.84915200  |
| B  | 1.00784200  | 2.13849800  | -0.99556300 |
| B  | -0.38698300 | 1.54447100  | -1.97028400 |
| B  | -1.27785600 | 1.93622500  | 0.98808000  |
| B  | 2.55175500  | -0.50419700 | -0.51096700 |
| B  | -1.15308100 | -1.04361000 | -2.20992800 |
| B  | 1.52540000  | -1.79135500 | -0.79412400 |
| B  | 0.00000000  | 2.49406400  | 0.22086400  |
| B  | -2.55175500 | 0.50419700  | -0.51096700 |
| B  | 0.00000000  | -2.49406400 | 0.22086400  |
| B  | 1.16069400  | -0.83482100 | 2.25242900  |
| B  | -1.57364200 | -0.79275300 | 1.91400400  |
| B  | 1.15308100  | 1.04361000  | -2.20992800 |
| B  | 2.34004800  | -0.55494900 | 1.18557500  |
| B  | -2.34707600 | -1.06456400 | -1.09424500 |
| B  | -2.51508900 | -0.89667300 | 0.48328300  |
| B  | -1.00784200 | -2.13849800 | -0.99556300 |
| B  | -2.34004800 | 0.55494900  | 1.18557500  |
| B  | 0.00000000  | 0.00000000  | -2.65164300 |
| Ta | 0.00000000  | 0.00000000  | 0.00103400  |

$C_2 Ta@B_{28}^{3+}$  (8)

|    |             |             |             |
|----|-------------|-------------|-------------|
| B  | 1.34638600  | -1.99635800 | 1.24398100  |
| B  | -1.91642600 | 1.36531800  | -1.29459900 |
| B  | 0.23766000  | 1.84982400  | 1.94702300  |
| B  | -1.46872400 | -0.85279000 | 2.04221500  |
| B  | -1.24212300 | 2.61106400  | -0.38333900 |
| B  | 0.91143200  | 1.20503800  | -2.07107000 |
| B  | 2.53897800  | 0.88079100  | 0.68683000  |
| B  | -1.98896600 | -1.38327000 | -0.81758600 |
| B  | -0.69561800 | 0.49585500  | -2.30401100 |
| B  | 1.46872400  | 0.85279000  | 2.04221500  |
| B  | -0.91143200 | -1.20503800 | -2.07107000 |
| B  | 2.61735000  | -0.23225100 | -0.40182100 |
| B  | 2.13029100  | -0.55614300 | 1.43247500  |
| B  | 1.47915500  | 2.11612400  | 0.68773100  |
| B  | 1.24212300  | -2.61106400 | -0.38333900 |
| B  | 0.69561800  | -0.49585500 | -2.30401100 |
| B  | -1.47915500 | -2.11612400 | 0.68773100  |
| B  | 0.00000000  | -2.78261000 | 0.58528800  |
| B  | 1.98896600  | 1.38327000  | -0.81758600 |
| B  | -2.61735000 | 0.23225100  | -0.40182100 |
| B  | 0.00000000  | 2.78261000  | 0.58528800  |
| B  | -1.34638600 | 1.99635800  | 1.24398100  |
| B  | -0.23766000 | -1.84982400 | 1.94702300  |
| B  | -2.13029100 | 0.55614300  | 1.43247500  |
| B  | 0.47704200  | -2.03741400 | -1.72136300 |
| B  | 1.91642600  | -1.36531800 | -1.29459900 |
| B  | -0.47704200 | 2.03741400  | -1.72136300 |
| B  | -2.53897800 | -0.88079100 | 0.68683000  |
| Ta | 0.00000000  | 0.00000000  | 0.05044500  |

$C_I \text{Ta@B}_{29}^{4+}$ 

|    |             |             |             |
|----|-------------|-------------|-------------|
| B  | 2.47407300  | 0.05257200  | 1.44104700  |
| B  | -1.69360800 | -0.50675300 | -2.12483700 |
| B  | -2.91597800 | 0.72252900  | 0.11802900  |
| B  | -1.29767700 | -1.97006500 | -1.11383000 |
| B  | -1.97564500 | 0.85362400  | 1.52848300  |
| B  | 0.38850300  | -2.21439300 | -1.18524000 |
| B  | 1.30817700  | -1.17798000 | -2.22501700 |
| B  | 2.20778700  | 1.40020000  | 0.60275800  |
| B  | -0.35795500 | 2.54372400  | -0.09107500 |
| B  | 1.35202900  | -1.13527100 | 1.95290800  |
| B  | -0.36472300 | -1.27434000 | -2.42750000 |
| B  | -2.79878000 | -0.56466500 | 1.08054400  |
| B  | -1.44384300 | -1.29228800 | 1.75563000  |
| B  | -0.98478500 | 1.83576100  | -1.68842400 |
| B  | 0.55946100  | 2.03187500  | 1.28529300  |
| B  | -0.50728000 | 1.08300100  | 2.26652600  |
| B  | 1.28904200  | 2.50484600  | -0.12510600 |
| B  | -0.13823000 | -0.64329400 | 2.51921200  |
| B  | 0.98936200  | -2.32769900 | 0.55177600  |
| B  | -1.87015900 | 1.90455100  | -0.15677200 |
| B  | 2.42042800  | -1.41773500 | 0.68583000  |
| B  | 1.04100900  | 0.53312400  | 2.24233500  |
| B  | 2.05268600  | 0.20488800  | -2.04667100 |
| B  | 1.95180700  | -1.84652500 | -0.79780100 |
| B  | 0.56311500  | 2.14710000  | -1.60145500 |
| B  | -2.14441000 | -1.84456100 | 0.29508100  |
| B  | 2.09597100  | 1.52041500  | -1.18544600 |
| B  | -2.30893700 | 0.85922300  | -1.46424200 |
| B  | -0.63589100 | -2.40802600 | 0.52231300  |
| Ta | 0.05099000  | 0.02918900  | -0.04207900 |
